# Supplementary material for: Sumoylation of HDAC2 promotes NF-κB-dependent gene expression
Source: Oncotarget. 2015 Jan 21;6(9):7123–35. doi: 10.18632/oncotarget.3344 (PMC4466673; doi:10.18632/oncotarget.3344)
Supplement: Supplementary file 1 [file oncotarget-06-7123-s001.pdf]

Sumoylation of HDAC2 promotes NF-κB-dependent gene expression

Supplementary Material

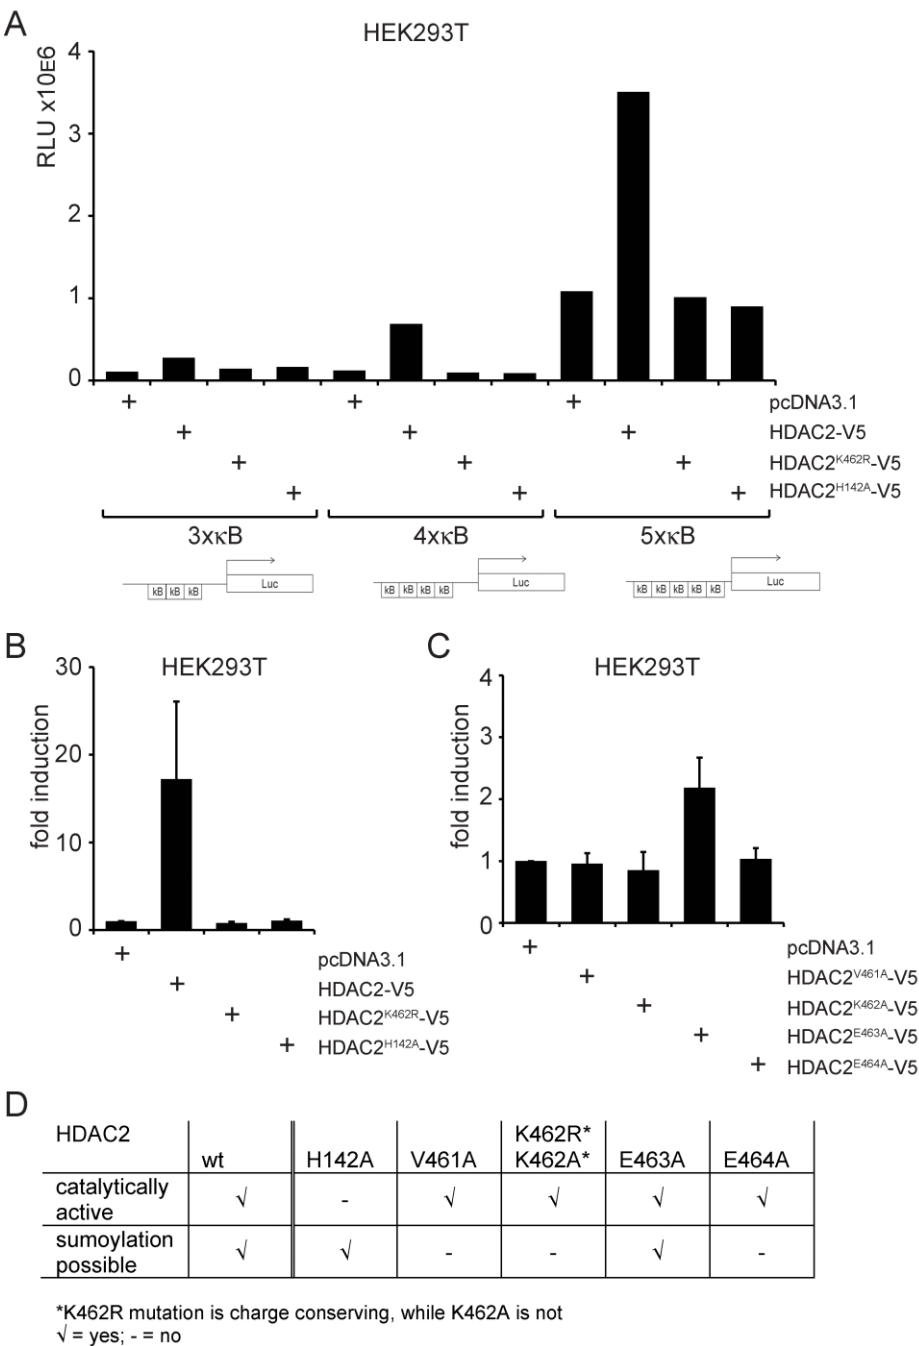

**Supplementary Figure S1:** (A) Representative diagram of κB-Luc reporter gene assay in HEK293T cells using reporter constructs with increasing number of κB consensus sites (3/4/5) with cotransfection of HDAC2 variants or empty vector as in Figure 1A as indicated. HDAC2-V5 cotransfection induces

reporter gene expression in from all reporter gene constructs. Relative induction is highest with 4 $\times$  $\kappa$ B-Luc. Graph shows relative luciferase units (RLU) derived of luciferase intensity after normalization to activity of cotransfected  $\beta$ -Gal. **(B)** Luciferase assay with 4 $\times$  $\kappa$ B-Luc in HEK293T cells, as in Figure 1B but with catalytically inactive HDAC2<sup>H142A</sup> included as control. Assay shows that HDAC2<sup>H142A</sup> like HDAC2<sup>K462R</sup> is not affecting reporter gene expression. Bar graph depicts mean  $\pm$  sem of n=5 independent experiments. The values for pcDNA 3.1, HDAC2-V5 and HDAC2<sup>K462R</sup>-V5 are a subset of those shown in Figure 1B. **(C)** Luciferase assay (4 $\times$  $\kappa$ B-Luc) in HEK293T cells with testing induction of 4 $\times$  $\kappa$ B-Luc with HDAC2 constructs having point mutations in the  $\Psi$ KxE sumoylation consensus motif (VK<sup>462</sup>EE in HDAC2). Notably, only mutant HDAC2<sup>E463A</sup> in which the inert “x” position is mutated is able to increase reporter gene activity. Diagram show fold induction of mock transfected control, mean  $\pm$  sem of n=3 independent experiments. **(D)** Summary of the HDAC2 mutants used, characterized by us and others. The catalytic activity of each mutant and the ability to become sumoylated is listed.

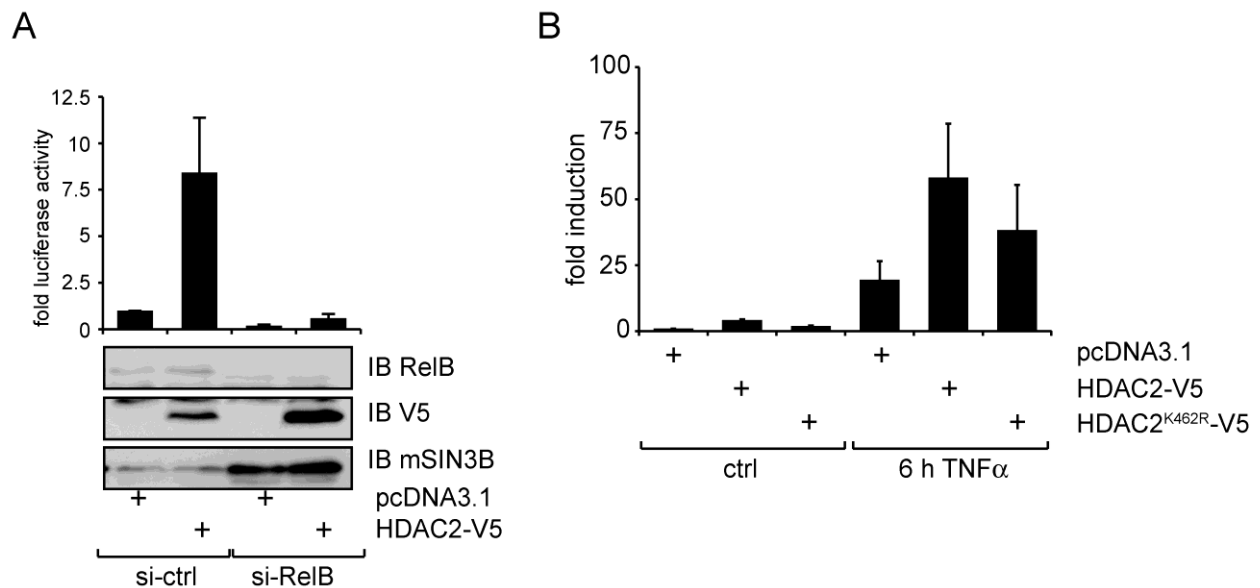

**Supplementary Figure S2:** **(A)** RKO cells transfected as in Figure 2A, knockdown of RelB diminishes HDAC2-caused NF- $\kappa$ B reporter gene induction; n=3. **(B)** RKO cells transfected as in Figure 1C with 4 $\times$  $\kappa$ B-Luc assay together with HDAC2-V5 and HDAC2<sup>K462R</sup>-V5. Cells were treated with 20 ng/ml TNF $\alpha$  for 6 h or left untreated for control prior to harvest. n=4. Induction of the reporter shows principally intact NF- $\kappa$ B signaling in these cells.

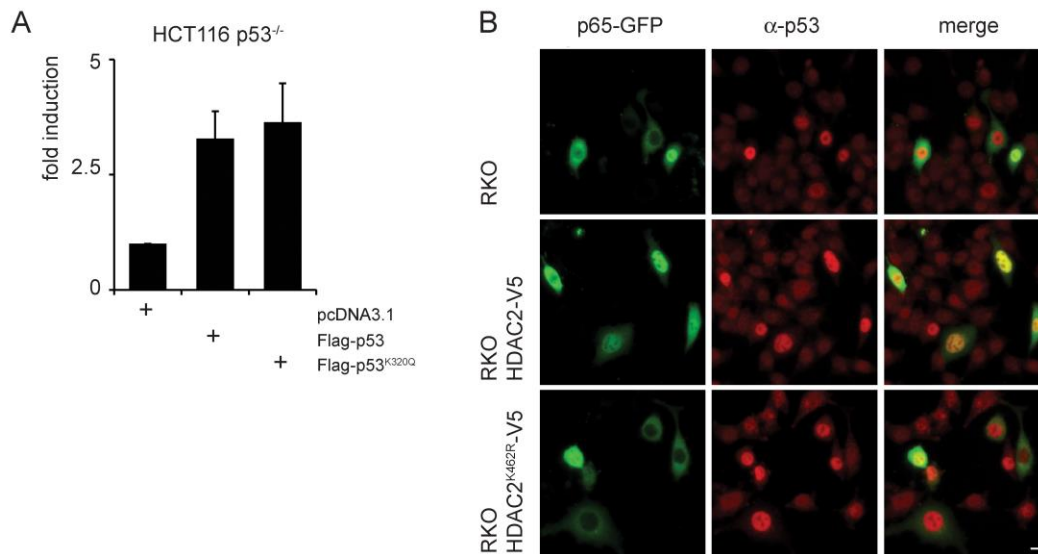

**Supplementary Figure S3:** (A) Luciferase assay with 4xκB-Luc in HCT116 p53<sup>-/-</sup> cells and reconstitution with either Flag-tagged wild-type p53 or a pseudo-acetylated p53<sup>K320Q</sup>. n=4. (B) Representative image of RKO, RKO HDAC2-V5 and RKO HDAC2<sup>K462R</sup>-V5 cells transiently transfected with p65-GFP as in Figure 3A, but with additional staining of endogenous p53. Bar = 10 μm.
